# Supplementary material for: UBE3A-mediated p18/LAMTOR1 ubiquitination and degradation regulate mTORC1 activity and synaptic plasticity
Source: eLife. 2018 Jul 18;7:e37993. doi: 10.7554/eLife.37993 (PMC6063731; doi:10.7554/eLife.37993)
Supplement: Figure 1—source data 1. [file elife-37993-fig1-data1.xlsx]

## Sheet: Figure 1A
		siScrambled	siUBE3A
		95.3296	135.618
		90.8332	126.28
		110.532	171.75
		95.3214	122.042
		92.3257	117.452
		115.658	159.994
		Unpaired t test
		P value	0.003
		P value summary	**
		Significantly different? (P < 0.05)	Yes
		One- or two-tailed P value?	Two-tailed
		t, df	t=3.898 df=10

## Sheet: Figure 1E
		None	UBE3A	UBE3A
		102.384	158.23	107.969
		110.569	177.644	143.059
		90.3274	121.996	96.805
		96.7192	170.578	86.3859
		ANOVA summary
		F	8.805
		P value	0.0076
		P value summary	**
		Are differences among means statistically significant? (P < 0.05)	Yes
		R square	0.6618
		Tukey's multiple comparisons test	Mean Diff.	95% CI of diff.	Significant?	Summary	Adjusted P Value
		None vs. UBE3A	-57.11	-98.10 to -16.12	Yes	**	0.0093
		None vs. UBE3A	-8.555	-49.54 to 32.43	No	ns	0.8325
		UBE3A vs. UBE3A	48.56	7.569 to 89.55	Yes	*	0.0224

## Sheet: figure supplement 1B
		None	UBE3A	UBE3A
		99.5321	69.4257	106.935
		97.3418	78.8005	110.939
		103.126	91.9223	120.186
		ANOVA summary
		F	13.36
		P value	0.0062
		P value summary	**
		Are differences among means statistically significant? (P < 0.05)	Yes
		R square	0.8166
		Tukey's multiple comparisons test	Mean Diff.	95% CI of diff.	Significant?	Summary	Adjusted P Value
		None vs. UBE3A	19.95	0.4154 to 39.49	Yes	*	0.0462
		None vs. UBE3A	-12.69	-32.22 to 6.848	No	ns	0.1947
		UBE3A vs. UBE3A	-32.64	-52.17 to -13.10	Yes	**	0.0052

## Sheet: figure supplement 1E
			HA-p18			HA-p18G2A
		p-4EBP1/4EBP1	86.1314	102.555	111.314	57.2993	59.489	68.2482
		p-S6/S6	98.9446	100.132	100.924	75	85.686	79.9472
			Discovery?	P value	Mean1	Mean2	Difference	SE of difference	t ratio	df
		p-4EBP1/4EBP1	*	0.00911108	100	61.6788	38.3212	8.10351	4.72896	4
		p-S6/S6	*	0.003243	100	80.2111	19.7889	3.1407	6.30079	4
