# Supplementary material for: UBE3A-mediated p18/LAMTOR1 ubiquitination and degradation regulate mTORC1 activity and synaptic plasticity
Source: eLife. 2018 Jul 18;7:e37993. doi: 10.7554/eLife.37993 (PMC6063731; doi:10.7554/eLife.37993)
Supplement: Figure 2—source data 1. [file elife-37993-fig2-data1.xlsx]

## Sheet: Figure 2F
			shScrambled													shP18
		p18	87.6473	98.0111	116.783	117.392	125.757	184.072	56.534	105.225	108.418	105.898	81.0857	47.4303	65.7463	8.67565	6.6007	11.9586	12.0151	5.06242	10.8614	8.56701	5.92716	7.4372	9.73376	6.74845	5.41658	5.33401
		LAMTOR4	91.5978	80.9274	120.873	114.111	115.63	94.1302	79.8473	131.015	127.976	52.953	90.9393			9.18004	4.1785	9.4586	8.66089	23.4882	6.45261	25.033	4.71031	16.9292	4.96355	23.5262
		RagA	146.269	71.044	150.27	55.5647	134.911	41.9409								4.08091	8.32264	29.5916	8.36285	16.0824	3.76529
		LAMP2	106.19	99.7293	89.5446	121.952	109.031	73.5526								197.005	146.152	76.6592	126.559	83.4549	87.8501
			Discovery?	P value	Mean1	Mean2	Difference	SE of difference	t ratio	df
		p18	*	1.5503e-09	100	8.02601	91.974	9.76107	9.42253	24
		LAMTOR4	*	3.252e-10	100	12.4165	87.5835	7.67012	11.4188	20
		RagA	*	0.00152135	100	11.7009	88.2991	20.456	4.31654	10
		LAMP2		0.355832	100	119.613	-19.6134	20.26	0.968085	10

## Sheet: Figure 2G
			shScrambled			shP18
		p18	96.6107	102.659	100.73	29.4736	34.0017	31.0266
		p14	98.0106	102.386	99.6033	36.0539	36.929	33.2011
		LAMTOR4	100.725	100.725	98.5497	26.9761	25.9971	23.169
		RagA	101.799	98.9717	99.2288	39.1362	51.8638	54.1131
		RagB	97.9145	101.715	100.371	55.0147	31.3658	38.6845
			Discovery?	P value	Mean1	Mean2	Difference	SE of difference	t ratio	df
		p18	*	6.62204e-06	100	31.5007	68.4994	2.22412	30.7984	4
		p14	*	2.88611e-06	100	35.3947	64.6053	1.70338	37.9277	4
		LAMTOR4	*	6.45779e-07	100	25.3807	74.6193	1.3523	55.1797	4
		RagA	*	0.00040647	100	48.371	51.629	4.74942	10.8706	4
		RagB	*	0.00118384	100	41.6883	58.3117	7.07809	8.23834	4
