# Supplementary material for: UBE3A-mediated p18/LAMTOR1 ubiquitination and degradation regulate mTORC1 activity and synaptic plasticity
Source: eLife. 2018 Jul 18;7:e37993. doi: 10.7554/eLife.37993 (PMC6063731; doi:10.7554/eLife.37993)
Supplement: Figure 3—source data 1. [file elife-37993-fig3-data1.xlsx]

## Sheet: Figure 3A
		WT	AS
		90.0823	182.281
		99.9608	174.049
		109.957	128.185
		Unpaired t test
		P value	0.0258
		P value summary	*
		Significantly different? (P < 0.05)	Yes
		One- or two-tailed P value?	Two-tailed
		t, df	t=3.459 df=4

## Sheet: Figure 3C
		WT	AS
		110.236	79.185
		91.3428	68.2825
		98.4215	45.0325
		Unpaired t test
		P value	0.0355
		P value summary	*
		Significantly different? (P < 0.05)	Yes
		One- or two-tailed P value?	Two-tailed
		t, df	t=3.121 df=4

## Sheet: Figure 3D
			DMSO			MG132			BafA
		WT	95.0382	104.771	100.191	121.947	129.389	131.966	101.336	105.63	100.763
		AS	138.55	122.805	129.389	174.656	135.29	154.58	120.802	121.947	125.095
		ANOVA table	SS	DF	MS	F (DFn, DFd)	P value
		Interaction	81.91	2	40.96	F (2, 12) = 0.4792	P = 0.6306
		Row Factor	2992	1	2992	F (1, 12) = 35.01	P < 0.0001
		Column Factor	3032	2	1516	F (2, 12) = 17.74	P = 0.0003
		Residual	1026	12	85.47
		Tukey's multiple comparisons test	Mean Diff.	95% CI of diff.	Significant?	Summary	Adjusted P Value
		WT:DMSO vs. WT:MG132	-27.77	-53.12 to -2.413	Yes	*	0.0292
		WT:DMSO vs. WT:BafA	-2.576	-27.93 to 22.78	No	ns	0.9992
		WT:DMSO vs. AS:DMSO	-30.25	-55.60 to -4.894	Yes	*	0.0168
		WT:DMSO vs. AS:MG132	-54.84	-80.20 to -29.49	Yes	***	0.0001
		WT:DMSO vs. AS:BafA	-22.61	-47.97 to 2.740	No	ns	0.0912
		WT:MG132 vs. WT:BafA	25.19	-0.1636 to 50.55	No	ns	0.0518
		WT:MG132 vs. AS:DMSO	-2.481	-27.84 to 22.87	No	ns	0.9993
		WT:MG132 vs. AS:MG132	-27.08	-52.43 to -1.721	Yes	*	0.0341
		WT:MG132 vs. AS:BafA	5.153	-20.20 to 30.51	No	ns	0.9806
		WT:BafA vs. AS:DMSO	-27.67	-53.03 to -2.317	Yes	*	0.0298
		WT:BafA vs. AS:MG132	-52.27	-77.62 to -26.91	Yes	***	0.0002
		WT:BafA vs. AS:BafA	-20.04	-45.39 to 5.316	No	ns	0.1569
		AS:DMSO vs. AS:MG132	-24.59	-49.95 to 0.7602	No	ns	0.0592
		AS:DMSO vs. AS:BafA	7.634	-17.72 to 32.99	No	ns	0.9054
		AS:MG132 vs. AS:BafA	32.23	6.873 to 57.58	Yes	*	0.0108

## Sheet: Figure 3E
			DMSO			MG132			BafA
		WT	94.1208	102.654	103.226	192.593	172.536	138.728	123.428	110.675	102.078
		AS	157.531	144.831	163.606	200.87	163.055	137.385	173.943	165.865	134.959
		ANOVA table	SS	DF	MS	F (DFn, DFd)	P value
		Interaction	2726	2	1363	F (2, 12) = 3.383	P = 0.0684
		Row Factor	5067	1	5067	F (1, 12) = 12.58	P = 0.0040
		Column Factor	5387	2	2693	F (2, 12) = 6.685	P = 0.0112
		Residual	4835	12	402.9
		Tukey's multiple comparisons test	Mean Diff.	95% CI of diff.	Significant?	Summary	Adjusted P Value
		WT:DMSO vs. WT:MG132	-67.95	-123.0 to -12.90	Yes	*	0.0133
		WT:DMSO vs. WT:BafA	-12.06	-67.11 to 42.99	No	ns	0.9733
		WT:DMSO vs. AS:DMSO	-55.32	-110.4 to -0.2717	Yes	*	0.0486
		WT:DMSO vs. AS:MG132	-67.1	-122.2 to -12.05	Yes	*	0.0145
		WT:DMSO vs. AS:BafA	-58.26	-113.3 to -3.205	Yes	*	0.036
		WT:MG132 vs. WT:BafA	55.89	0.8412 to 110.9	Yes	*	0.0459
		WT:MG132 vs. AS:DMSO	12.63	-42.42 to 67.68	No	ns	0.9675
		WT:MG132 vs. AS:MG132	0.849	-54.20 to 55.90	No	ns	> 0.9999
		WT:MG132 vs. AS:BafA	9.697	-45.35 to 64.75	No	ns	0.9897
		WT:BafA vs. AS:DMSO	-43.26	-98.31 to 11.79	No	ns	0.1606
		WT:BafA vs. AS:MG132	-55.04	-110.1 to 0.007839	No	ns	0.05
		WT:BafA vs. AS:BafA	-46.2	-101.2 to 8.856	No	ns	0.1213
		AS:DMSO vs. AS:MG132	-11.78	-66.83 to 43.27	No	ns	0.9758
		AS:DMSO vs. AS:BafA	-2.933	-57.98 to 52.12	No	ns	> 0.9999
		AS:MG132 vs. AS:BafA	8.848	-46.20 to 63.90	No	ns	0.9932

## Sheet: figure supplement 1B
		WT	AS
		99.3469	51.2845
		89.5552	44.3992
		111.098	67.915
		Unpaired t test
		P value	0.0083
		P value summary	**
		Significantly different? (P < 0.05)	Yes
		One- or two-tailed P value?	Two-tailed
		t, df	t=4.861 df=4
