# Supplementary material for: UBE3A-mediated p18/LAMTOR1 ubiquitination and degradation regulate mTORC1 activity and synaptic plasticity
Source: eLife. 2018 Jul 18;7:e37993. doi: 10.7554/eLife.37993 (PMC6063731; doi:10.7554/eLife.37993)
Supplement: Figure 4—source data 1. [file elife-37993-fig4-data1.xlsx]

## Sheet: Figure 4B
			WT										AS
		p18	0.43392	0.37402	0.55148	0.684	0.39662	0.56874	0.52672	0.44044			0.67384	0.67438	0.77678	0.724	0.92646	0.72392	0.63254	0.77478
		LAMTOR4	0.4243	0.1518	0.61446	0.40017	0.37878	0.434424					0.578412	0.699264	0.413568	0.610704	0.7689	0.71121
		RagA	0.413457	0.402032	0.40056	0.437456	0.405	0.42					0.532264	0.588432	0.575168	0.64048	0.58	0.59136
		mTOR	0.205333	0.242133	0.226867	0.3614	0.249733	0.28	0.1578	0.221			0.464533	0.47634	0.2956	0.3562	0.303067	0.457867	0.2398	0.331067
			Discovery?	P value	Mean1	Mean2	Difference	SE of difference	t ratio	df
		p18	*	0.000223011	0.496992	0.738338	-0.241345	0.0489895	4.92646	14
		LAMTOR4		0.0162939	0.400656	0.630343	-0.229687	0.079662	2.88327	10
		RagA	*	5.50628e-07	0.413084	0.584617	-0.171533	0.0152954	11.2147	10
		mTOR	*	0.00623206	0.243033	0.365559	-0.122526	0.038111	3.21498	14

## Sheet: Figure 4D
			WT										AS
		p18	0.228	0.07863	0.2694	0.15129	0.14295	0.18978	0.20979	0.23595			0.22875	0.37095	0.3177	0.39669	0.35562	0.27432	0.19665	0.22965
		mTOR	0.238903	0.160673	0.296407	0.044863	0.04247	0.16581	0.158				0.24614	0.25361	0.29016	0.31179	0.294857	0.297737	0.211
			Discovery?	P value	Mean1	Mean2	Difference	SE of difference	t ratio	df
		p18		0.00691654	0.188224	0.296291	-0.108068	0.0341707	3.16258	14
		mTOR		0.010598	0.158161	0.272185	-0.114024	0.0377152	3.02329	12

## Sheet: Figure 4F
			WT										AS
		soma	0.30142	0.22897	0.21931	0.19362	0.23226	0.21896					0.45752	0.27657	0.62202	0.45388	0.8869	0.57848
		dendrite	0.1717	0.118145	0.31133	0.147145	0.161	0.194					0.374805	0.208265	0.452295	0.353205	0.224	0.211
			Discovery?	P value	Mean1	Mean2	Difference	SE of difference	t ratio	df
		soma	*	0.00430013	0.232423	0.545895	-0.313472	0.0853591	3.67239	10
		dendrite		0.0386223	0.183887	0.303928	-0.120042	0.0504408	2.37985	10

## Sheet: Figure 4G
		WT	AS
		105.378	84.1424
		102.348	76.9158
		92.2741	72.1393
		Unpaired t test
		P value	0.0135
		P value summary	*
		Significantly different? (P < 0.05)	Yes
		One- or two-tailed P value?	Two-tailed
		t, df	t=4.219 df=4

## Sheet: figure supplement 1D
			WT											AS
		p14	0.1646	0.34057	0.11629	0.14537	0.16367							0.37009	0.28567	0.44739	0.41795	0.21425
		MP1	0.015125	0.07415	0.092675	0.100675	0.298175	0.47175						0.15885	0.420575	0.47465	0.546625	0.335975	0.38905
		RagB	0.41344	0.36419	0.37088	0.38518	0.70731	0.40347	0.37481	0.42007	0.33932	0.34262	0.47719	0.53931	0.6414	0.61319	0.60973	0.72146	0.52661	0.52357	0.40441	0.55813
			Discovery?	P value	Mean1	Mean2	Difference	SE of difference	t ratio	df
		p14		0.0249517	0.1861	0.34707	-0.16097	0.0584756	2.75277	8
		MP1		0.0391851	0.175425	0.387621	-0.212196	0.0894822	2.37138	10
		RagB	*	0.00264619	0.418044	0.570868	-0.152824	0.0438582	3.48451	18

## Sheet: figure supplement 2D
			WT										AS
		Raptor	0.455965	0.291325	0.45637	0.45076	0.21835	0.36919					0.502853	0.609475	0.5515	0.54975	0.64063	0.52106
		Rictor	0.02819	0.0235	0.00843	0.08176	0.00158	0.00042					0.00655	0.0273	0.00222	0.00043	0.00058	0.00993
			Discovery?	P value	Mean1	Mean2	Difference	SE of difference	t ratio	df
		Raptor	*	0.0022202	0.37366	0.562545	-0.188885	0.0463139	4.07836	10
		Rictor		0.247286	0.02398	0.007835	0.016145	0.0131391	1.22878	10

## Sheet: figure supplement 2E
			WT			AS
		p18	100.579	98.7273	100.693	175.23	155.3	163.349
		p14	100.395	97.2011	102.403	171.585	162.458	141.357
		LAMTOR4	100	100.171	99.8291	128.547	134.701	135.385
		RagA	101.618	102.759	95.6232	146.717	146.527	166.508
		RagC	100.972	98.75	100.278	152.778	187.5	143.056
		mTOR	99.0361	99.759	101.205	126.747	129.88	128.193
		Raptor	101.565	98.1508	100.284	164.296	150.427	153.627
		LAMP2	98.8903	105.744	95.3655	115.731	122.389	118.864
			Discovery?	P value	Mean1	Mean2	Difference	SE of difference	t ratio	df
		p18	*	0.000375136	100	164.626	-64.6262	5.8238	11.0969	4
		p14	*	0.00299111	100	158.467	-58.4667	9.07867	6.44001	4
		LAMTOR4	*	0.000111938	100	132.878	-32.8775	2.17647	15.1059	4
		RagA	*	0.00159255	100	153.251	-53.2509	6.98851	7.61977	4
		RagC		0.0106187	100	161.111	-61.1111	13.5056	4.52488	4
		mTOR	*	1.39651e-05	100	128.273	-28.2731	1.10714	25.537	4
		Raptor	*	0.000200694	100	156.117	-56.1166	4.30932	13.0222	4
		LAMP2	*	0.00620457	100	118.995	-18.9948	3.60309	5.2718	4
