# Supplementary material for: UBE3A-mediated p18/LAMTOR1 ubiquitination and degradation regulate mTORC1 activity and synaptic plasticity
Source: eLife. 2018 Jul 18;7:e37993. doi: 10.7554/eLife.37993 (PMC6063731; doi:10.7554/eLife.37993)
Supplement: Figure 5—source data 1. [file elife-37993-fig5-data1.xlsx]

## Sheet: Figure 5B
	Ube3a
			shScrambled						shP18
		Accell siScrambled	93.7584	99.6585	106.583				103.987	96.7274	109.927
		Accell siUBE3A	72.194	41.9738	76.0477				76.4557	54.1673	76.1495
		ANOVA table	SS	DF	MS	F (DFn, DFd)	P value
		Interaction	2.916	1	2.916	F (1, 8) = 0.01956	P = 0.8922
		Row Factor	3804	1	3804	F (1, 8) = 25.51	P = 0.0010
		Column Factor	61.65	1	61.65	F (1, 8) = 0.4134	P = 0.5382
		Residual	1193	8	149.1
		Tukey's multiple comparisons test	Mean Diff.	95% CI of diff.	Significant?	Summary	Adjusted P Value
		Accell siScrambled:shScrambled vs. Accell siScrambled:shP18	-3.547	-35.48 to 28.38	No	ns	0.9835
		Accell siScrambled:shScrambled vs. Accell siUBE3A:shScrambled	36.59	4.666 to 68.52	Yes	*	0.0261
		Accell siScrambled:shScrambled vs. Accell siUBE3A:shP18	31.08	-0.8528 to 63.00	No	ns	0.0564
		Accell siScrambled:shP18 vs. Accell siUBE3A:shScrambled	40.14	8.213 to 72.07	Yes	*	0.0161
		Accell siScrambled:shP18 vs. Accell siUBE3A:shP18	34.62	2.694 to 66.55	Yes	*	0.0343
		Accell siUBE3A:shScrambled vs. Accell siUBE3A:shP18	-5.519	-37.45 to 26.41	No	ns	0.943
	p18
			shScrambled						shP18
		Accell siScrambled	92.7652	104.328	102.907				48.1603	48.0556	58.3982
		Accell siUBE3A	131.696	144.664	132.225				51.8018	61.8209	69.4477
		ANOVA table	SS	DF	MS	F (DFn, DFd)	P value
		Interaction	535.1	1	535.1	F (1, 8) = 10.33	P = 0.0124
		Row Factor	1565	1	1565	F (1, 8) = 30.21	P = 0.0006
		Column Factor	11464	1	11464	F (1, 8) = 221.3	P < 0.0001
		Residual	414.5	8	51.81
		Tukey's multiple comparisons test	Mean Diff.	95% CI of diff.	Significant?	Summary	Adjusted P Value
		Accell siScrambled:shScrambled vs. Accell siScrambled:shP18	48.46	29.64 to 67.28	Yes	***	0.0002
		Accell siScrambled:shScrambled vs. Accell siUBE3A:shScrambled	-36.2	-55.02 to -17.37	Yes	**	0.0012
		Accell siScrambled:shScrambled vs. Accell siUBE3A:shP18	38.98	20.16 to 57.80	Yes	***	0.0007
		Accell siScrambled:shP18 vs. Accell siUBE3A:shScrambled	-84.66	-103.5 to -65.84	Yes	****	< 0.0001
		Accell siScrambled:shP18 vs. Accell siUBE3A:shP18	-9.485	-28.31 to 9.335	No	ns	0.4232
		Accell siUBE3A:shScrambled vs. Accell siUBE3A:shP18	75.17	56.35 to 93.99	Yes	****	< 0.0001
	p-mTOR
			shScrambled						shP18
		Accell siScrambled	98.9548	99.7746	101.271				85.7795	81.2798	89.9554
		Accell siUBE3A	110.448	119.316	118.543				92.227	96.4893	99.5733
		ANOVA table	SS	DF	MS	F (DFn, DFd)	P value
		Interaction	24.17	1	24.17	F (1, 8) = 1.669	P = 0.2325
		Row Factor	527.8	1	527.8	F (1, 8) = 36.44	P = 0.0003
		Column Factor	884.1	1	884.1	F (1, 8) = 61.04	P < 0.0001
		Residual	115.9	8	14.48
		Tukey's multiple comparisons test	Mean Diff.	95% CI of diff.	Significant?	Summary	Adjusted P Value
		Accell siScrambled:shScrambled vs. Accell siScrambled:shP18	14.33	4.377 to 24.28	Yes	**	0.0075
		Accell siScrambled:shScrambled vs. Accell siUBE3A:shScrambled	-16.1	-26.05 to -6.151	Yes	**	0.0037
		Accell siScrambled:shScrambled vs. Accell siUBE3A:shP18	3.903	-6.048 to 13.85	No	ns	0.6122
		Accell siScrambled:shP18 vs. Accell siUBE3A:shScrambled	-30.43	-40.38 to -20.48	Yes	****	< 0.0001
		Accell siScrambled:shP18 vs. Accell siUBE3A:shP18	-10.42	-20.38 to -0.4736	Yes	*	0.0404
		Accell siUBE3A:shScrambled vs. Accell siUBE3A:shP18	20.01	10.05 to 29.96	Yes	***	0.0009
	p-S6
			shScrambled						shP18
		Accell siScrambled	97.7774	95.5328	106.69				73.1546	67.4146	75.5827
		Accell siUBE3A	117.761	123.751	132.488				80.6485	93.0312	92.9157
		ANOVA table	SS	DF	MS	F (DFn, DFd)	P value
		Interaction	46.24	1	46.24	F (1, 8) = 1.171	P = 0.3107
		Row Factor	1291	1	1291	F (1, 8) = 32.69	P = 0.0004
		Column Factor	3048	1	3048	F (1, 8) = 77.21	P < 0.0001
		Residual	315.8	8	39.48
		Tukey's multiple comparisons test	Mean Diff.	95% CI of diff.	Significant?	Summary	Adjusted P Value
		Accell siScrambled:shScrambled vs. Accell siScrambled:shP18	27.95	11.52 to 44.38	Yes	**	0.0027
		Accell siScrambled:shScrambled vs. Accell siUBE3A:shScrambled	-24.67	-41.10 to -8.238	Yes	**	0.0059
		Accell siScrambled:shScrambled vs. Accell siUBE3A:shP18	11.13	-5.294 to 27.56	No	ns	0.211
		Accell siScrambled:shP18 vs. Accell siUBE3A:shScrambled	-52.62	-69.04 to -36.19	Yes	****	< 0.0001
		Accell siScrambled:shP18 vs. Accell siUBE3A:shP18	-16.81	-33.24 to -0.3860	Yes	*	0.045
		Accell siUBE3A:shScrambled vs. Accell siUBE3A:shP18	35.8	19.37 to 52.23	Yes	***	0.0005
	p-4EBP1
			shScrambled						shP18
		Accell siScrambled	101.779	96.5434	101.678				79.8522	78.9099	74.4745
		Accell siUBE3A	139.905	128.725	129.327				71.0161	79.7916	84.4639
		ANOVA table	SS	DF	MS	F (DFn, DFd)	P value
		Interaction	766.7	1	766.7	F (1, 8) = 29.67	P = 0.0006
		Row Factor	833.2	1	833.2	F (1, 8) = 32.24	P = 0.0005
		Column Factor	4387	1	4387	F (1, 8) = 169.8	P < 0.0001
		Residual	206.7	8	25.84
		Tukey's multiple comparisons test	Mean Diff.	95% CI of diff.	Significant?	Summary	Adjusted P Value
		Accell siScrambled:shScrambled vs. Accell siScrambled:shP18	22.25	8.963 to 35.55	Yes	**	0.003
		Accell siScrambled:shScrambled vs. Accell siUBE3A:shScrambled	-32.65	-45.94 to -19.36	Yes	***	0.0002
		Accell siScrambled:shScrambled vs. Accell siUBE3A:shP18	21.58	8.284 to 34.87	Yes	**	0.0036
		Accell siScrambled:shP18 vs. Accell siUBE3A:shScrambled	-54.91	-68.20 to -41.61	Yes	****	< 0.0001
		Accell siScrambled:shP18 vs. Accell siUBE3A:shP18	-0.6783	-13.97 to 12.61	No	ns	0.9983
		Accell siUBE3A:shScrambled vs. Accell siUBE3A:shP18	54.23	40.94 to 67.52	Yes	****	< 0.0001
	p-PKC
			shScrambled						shP18
		Accell siScrambled	94.3446	101.288	104.368				134.441	112.922	143.528
		Accell siUBE3A	63.1323	56.0505	77.3982				151.109	138.107	159.784
		ANOVA table	SS	DF	MS	F (DFn, DFd)	P value
		Interaction	2174	1	2174	F (1, 8) = 17.03	P = 0.0033
		Row Factor	171.1	1	171.1	F (1, 8) = 1.340	P = 0.2804
		Column Factor	9822	1	9822	F (1, 8) = 76.93	P < 0.0001
		Residual	1021	8	127.7
		Tukey's multiple comparisons test	Mean Diff.	95% CI of diff.	Significant?	Summary	Adjusted P Value
		Accell siScrambled:shScrambled vs. Accell siScrambled:shP18	-30.3	-59.84 to -0.7534	Yes	*	0.0446
		Accell siScrambled:shScrambled vs. Accell siUBE3A:shScrambled	34.47	4.929 to 64.02	Yes	*	0.0238
		Accell siScrambled:shScrambled vs. Accell siUBE3A:shP18	-49.67	-79.21 to -20.12	Yes	**	0.0029
		Accell siScrambled:shP18 vs. Accell siUBE3A:shScrambled	64.77	35.23 to 94.31	Yes	***	0.0005
		Accell siScrambled:shP18 vs. Accell siUBE3A:shP18	-19.37	-48.91 to 10.17	No	ns	0.2318
		Accell siUBE3A:shScrambled vs. Accell siUBE3A:shP18	-84.14	-113.7 to -54.60	Yes	****	< 0.0001
	PKC
			shScrambled						shP18
		Accell siScrambled	99.5346	97.6662	102.799				108.922	109.999	107.715
		Accell siUBE3A	71.8591	76.9923	85.3406				91.6851	108.36	105.728
		ANOVA table	SS	DF	MS	F (DFn, DFd)	P value
		Interaction	168.3	1	168.3	F (1, 8) = 4.998	P = 0.0558
		Row Factor	626	1	626	F (1, 8) = 18.59	P = 0.0026
		Column Factor	803.9	1	803.9	F (1, 8) = 23.87	P = 0.0012
		Residual	269.4	8	33.68
		Tukey's multiple comparisons test	Mean Diff.	95% CI of diff.	Significant?	Summary	Adjusted P Value
		Accell siScrambled:shScrambled vs. Accell siScrambled:shP18	-8.879	-24.05 to 6.295	No	ns	0.3101
		Accell siScrambled:shScrambled vs. Accell siUBE3A:shScrambled	21.94	6.762 to 37.11	Yes	**	0.0073
		Accell siScrambled:shScrambled vs. Accell siUBE3A:shP18	-1.924	-17.10 to 13.25	No	ns	0.9759
		Accell siScrambled:shP18 vs. Accell siUBE3A:shScrambled	30.81	15.64 to 45.99	Yes	***	0.0008
		Accell siScrambled:shP18 vs. Accell siUBE3A:shP18	6.954	-8.220 to 22.13	No	ns	0.4969
		Accell siUBE3A:shScrambled vs. Accell siUBE3A:shP18	-23.86	-39.03 to -8.686	Yes	**	0.0044

## Sheet: Figure 5D
	spine number
			shScrambled									shP18
		WT	2	2.5	1.9	2.4	1.8	2.1	1.7	2.1	2.2	2.8	3.1	2.7	2.5	3	2.7	2.4	3	2.5
		AS	1.1	1	1	1.2	0.8	1.4	0.7	1	1.2	1.9	1.8	2.3	2.1	2	2	1.6	2.2	1.8
		ANOVA table	SS	DF	MS	F (DFn, DFd)	P value
		Interaction	0.1469	1	0.1469	F (1, 32) = 2.612	P = 0.1159
		Row Factor	7.38	1	7.38	F (1, 32) = 131.2	P < 0.0001
		Column Factor	5.68	1	5.68	F (1, 32) = 101.0	P < 0.0001
		Residual	1.8	32	0.05625
		Tukey's multiple comparisons test	Mean Diff.	95% CI of diff.	Significant?	Summary	Adjusted P Value
		WT:shScrambled vs. WT:shP18	-0.6667	-0.9696 to -0.3638	Yes	****	< 0.0001
		WT:shScrambled vs. AS:shScrambled	1.033	0.7304 to 1.336	Yes	****	< 0.0001
		WT:shScrambled vs. AS:shP18	0.1111	-0.1918 to 0.4140	No	ns	0.754
		WT:shP18 vs. AS:shScrambled	1.7	1.397 to 2.003	Yes	****	< 0.0001
		WT:shP18 vs. AS:shP18	0.7778	0.4749 to 1.081	Yes	****	< 0.0001
		AS:shScrambled vs. AS:shP18	-0.9222	-1.225 to -0.6193	Yes	****	< 0.0001
	F-actin
			shScrambled									shP18
		WT	87.7975	97.9325	100.638	94.2353	90.8706	90.4274	120.15	96.0256	121.923	167.215	159.355	119.928	171.595	150.567	131.994	110.382	134.373	141.306
		AS	66.8686	63.0316	80.4849	73.9071	61.9061	56.8503	65.9881	53.2465	61.2763	82.3743	92.6725	94.4686	86.6137	117.52	98.0258	82.3743	95.6524	93.9846
		ANOVA table	SS	DF	MS	F (DFn, DFd)	P value
		Interaction	445.1	1	445.1	F (1, 32) = 2.282	P = 0.1407
		Row Factor	16022	1	16022	F (1, 32) = 82.15	P < 0.0001
		Column Factor	11622	1	11622	F (1, 32) = 59.59	P < 0.0001
		Residual	6241	32	195
		Tukey's multiple comparisons test	Mean Diff.	95% CI of diff.	Significant?	Summary	Adjusted P Value
		WT:shScrambled vs. WT:shP18	-42.97	-60.81 to -25.13	Yes	****	< 0.0001
		WT:shScrambled vs. AS:shScrambled	35.16	17.32 to 53.00	Yes	****	< 0.0001
		WT:shScrambled vs. AS:shP18	6.257	-11.58 to 24.09	No	ns	0.778
		WT:shP18 vs. AS:shScrambled	78.13	60.29 to 95.97	Yes	****	< 0.0001
		WT:shP18 vs. AS:shP18	49.23	31.39 to 67.06	Yes	****	< 0.0001
		AS:shScrambled vs. AS:shP18	-28.9	-46.74 to -11.07	Yes	***	0.0006

## Sheet: figure supplement 1A
	p-AKT
			shScrambled						shP18
		Accell siScrambled	100.55	99.6089	99.8411				95.9795	110.27	101.063
		Accell siUBE3A	89.747	88.0117	87.8651				106.782	112.018	103.263
		ANOVA table	SS	DF	MS	F (DFn, DFd)	P value
		Interaction	201.1	1	201.1	F (1, 8) = 10.99	P = 0.0106
		Row Factor	32.1	1	32.1	F (1, 8) = 1.754	P = 0.2220
		Column Factor	338.7	1	338.7	F (1, 8) = 18.50	P = 0.0026
		Residual	146.4	8	18.3
		Tukey's multiple comparisons test	Mean Diff.	95% CI of diff.	Significant?	Summary	Adjusted P Value
		Accell siScrambled:shScrambled vs. Accell siScrambled:shP18	-2.438	-13.62 to 8.749	No	ns	0.8951
		Accell siScrambled:shScrambled vs. Accell siUBE3A:shScrambled	11.46	0.2722 to 22.65	Yes	*	0.0448
		Accell siScrambled:shScrambled vs. Accell siUBE3A:shP18	-7.354	-18.54 to 3.832	No	ns	0.2301
		Accell siScrambled:shP18 vs. Accell siUBE3A:shScrambled	13.9	2.710 to 25.08	Yes	*	0.0172
		Accell siScrambled:shP18 vs. Accell siUBE3A:shP18	-4.917	-16.10 to 6.270	No	ns	0.5288
		Accell siUBE3A:shScrambled vs. Accell siUBE3A:shP18	-18.81	-30.00 to -7.627	Yes	**	0.0029
