# Supplementary material for: UBE3A-mediated p18/LAMTOR1 ubiquitination and degradation regulate mTORC1 activity and synaptic plasticity
Source: eLife. 2018 Jul 18;7:e37993. doi: 10.7554/eLife.37993 (PMC6063731; doi:10.7554/eLife.37993)
Supplement: Figure 6—source data 1. [file elife-37993-fig6-data1.xlsx]

## Sheet: Figure 6C
			siScrambled						siP18
		WT	101.017	106.983	96.2508	114.92	91.5692	89.2599	31.3109	52.4405	70.2289	55.0893	71.6338	28.6884
		AS	161.797	143.439	134.769	135.873	131.392	140.194	47.5861	68.8781	84.0543	84.0689	86.4339	76.6535
		ANOVA table	SS	DF	MS	F (DFn, DFd)	P value
		Interaction	496.7	1	496.7	F (1, 20) = 2.578	P = 0.1240
		Row Factor	6200	1	6200	F (1, 20) = 32.19	P < 0.0001
		Column Factor	19860	1	19860	F (1, 20) = 103.1	P < 0.0001
		Residual	3853	20	192.6
		Tukey's multiple comparisons test	Mean Diff.	95% CI of diff.	Significant?	Summary	Adjusted P Value
		WT:siScrambled vs. WT:siP18	48.43	26.01 to 70.86	Yes	****	< 0.0001
		WT:siScrambled vs. AS:siScrambled	-41.24	-63.67 to -18.82	Yes	***	0.0003
		WT:siScrambled vs. AS:siP18	25.39	2.959 to 47.82	Yes	*	0.023
		WT:siP18 vs. AS:siScrambled	-89.68	-112.1 to -67.25	Yes	****	< 0.0001
		WT:siP18 vs. AS:siP18	-23.05	-45.48 to -0.6187	Yes	*	0.0427
		AS:siScrambled vs. AS:siP18	66.63	44.20 to 89.06	Yes	****	< 0.0001

## Sheet: Figure 6D
				WT-siScrambled			WT-siP18			AS-siScrambled			AS-siP18
		-10		101.025	0.9594	7	100.299	1.4405	14	101.811	0.9607	7	98.47	1.16	10
				100.866	0.842	7	100.877	0.9051	14	101.464	1.1262	7	99.4	1.14	10
				100.929	0.808	7	101.031	0.9258	14	102.185	1.296	7	98.73	0.82	10
				100.234	0.5614	7	101.14	1.0779	14	101.984	0.6176	7	99.47	0.66	10
				100.163	0.8435	7	101.122	0.6702	14	100.577	0.2757	7	100.2	0.7	10
				99.178	0.4215	7	101.569	1.0517	14	100.653	0.8707	7	99.8	1.11	10
				99.7957	0.7266	7	100.178	0.7327	14	100.281	0.9588	7	100.6	0.7	10
				100.262	0.73	7	101.816	1.2174	14	101.544	0.7216	7	101	0.78	10
				100.366	0.8143	7	102.377	0.9475	14	101.434	1.0257	7	100.7	0.75	10
				100.232	0.7284	7	100.059	0.8894	14	100.914	0.5007	7	99.91	1.1	10
				100.299	0.8209	7	99.9766	0.9179	14	102.019	0.7421	7	100.6	0.75	10
				100.593	0.6739	7	100.165	1.0445	14	101.111	0.9297	7	99.2	1.01	10
				100.048	0.5723	7	100.464	0.9347	14	100.378	1.6558	7	99.29	0.99	10
				99.2834	0.399	7	99.1983	0.9167	14	100.337	0.8719	7	98.89	0.89	10
				99.3023	0.4362	7	99.3988	0.8709	14	101.389	1.5238	7	99.5	0.76	10
				99.0818	0.613	7	99.9583	0.9262	14	100.761	0.9628	7	99.39	0.63	10
				98.986	0.6417	7	100.258	0.9635	14	100.537	0.7995	7	99.41	0.88	10
				100.426	1.1418	7	99.773	0.748	14	99.8	1.2287	7	100.2	0.88	10
				99.4187	0.6504	7	99.7627	0.9183	14	97.5091	1.195	7	100.1	1.01	10
				100.211	0.3036	7	99.0618	1.0983	14	100.625	0.7077	7	99.78	0.7	10
				99.6736	0.77	7	99.9591	0.6172	14	99.4495	1.1632	7	100.8	0.87	10
				100.162	0.3996	7	97.7793	0.8203	14	98.5398	1.2198	7	101.1	1.11	10
				100.304	0.5028	7	97.2261	1.0556	14	100.006	1.4816	7	100.3	0.55	10
				99.6834	0.6959	7	97.8033	0.7193	14	98.6813	1.6326	7	99.61	0.81	10
				99.8411	1.0536	7	98.629	0.9118	14	97.8347	1.2158	7	98.93	0.51	10
				99.8249	0.9908	7	97.0567	0.9495	14	97.7904	0.7528	7	99.46	0.49	10
				99.8406	1.1432	7	99.2152	0.7749	14	97.2502	0.825	7	98.49	0.69	10
				100.313	1.0639	7	100.296	1.2247	14	98.6433	1.235	7	99.93	0.69	10
				99.2662	1.2658	7	99.0643	1.1958	14	97.3043	0.7071	7	99.74	0.95	10
				100.393	0.9533	7	104.485	5.9702	14	97.1893	1.0843	7	107	6.73	10
		0		177.925	5.4971	7	165.066	5.7831	14	151.062	4.3913	7	180.4	6.59	10
				178.171	5.3352	7	159.052	6.8253	14	152.322	4.0755	7	186.3	6.52	10
				181.322	4.4826	7	160.88	6.6745	14	153.773	6.0554	7	185.3	5.95	10
				178.916	4.795	7	154.133	6.5121	14	154.147	5.4867	7	184.1	5.84	10
				175.986	4.4833	7	153.258	5.9474	14	148.71	5.2102	7	180.2	5.7	10
				173.97	5.0352	7	150.942	6.3706	14	146.588	4.1108	7	175.4	4.7	10
				169.556	4.8162	7	147.031	5.7612	14	141.129	3.726	7	172.1	4.75	10
				168.082	5.495	7	148.489	5.8055	14	137.201	2.7551	7	171.2	4.21	10
				165.465	5.4863	7	145.583	5.5747	14	136.41	2.8367	7	169.1	4.29	10
				163.264	4.4059	7	143.108	5.6638	14	134.654	2.4082	7	166.3	4.44	10
				161.47	4.9475	7	142.727	5.3837	14	133.411	2.2619	7	164.9	3.8	10
				162.365	4.6711	7	141.262	5.384	14	130.835	2.2457	7	163	3.19	10
				160.729	4.5769	7	141.228	5.3758	14	129.851	2.269	7	160.3	3.52	10
				160.144	4.2568	7	141.582	5.6026	14	128.848	2.0255	7	160.2	3.27	10
				160.363	4.6153	7	139.596	5.0869	14	126.568	2.4998	7	158.2	3.56	10
				159.45	4.2443	7	136.286	5.4595	14	126.406	2.0283	7	157	2.89	10
				159.286	4.5671	7	138.811	5.2394	14	125.491	3.3255	7	157.1	3.61	10
				159.053	4.6356	7	137.671	5.5109	14	125.599	2.9147	7	153.9	3.72	10
				158.59	4.5337	7	136.119	5.2691	14	124.603	1.9665	7	154.4	2.98	10
				158.117	3.7441	7	137.219	5.2466	14	124.354	3.2816	7	154.4	3.33	10
				158.155	4.0539	7	134.273	5.2978	14	121.82	2.5947	7	153.2	3.17	10
				158.794	3.8707	7	136.208	5.1871	14	121.028	1.8136	7	153.6	3.46	10
				158.012	4.1076	7	135.388	4.8622	14	121.541	2.5191	7	152.8	3.26	10
				159.075	3.2256	7	133.102	4.9443	14	120.87	3.3587	7	149.5	2.94	10
				157.533	3.8976	7	133.641	5.0491	14	118.645	2.3264	7	150.2	3.28	10
				157.019	3.7586	7	131.55	5.4181	14	119.225	3.2685	7	149.7	2.97	10
				157.287	3.8712	7	131.424	5.4266	14	119.363	3.1366	7	149	2.86	10
				157.707	3.5946	7	130.553	5.3217	14	117.821	3.8276	7	147.4	3.3	10
				158.451	3.5889	7	129.753	5.5617	14	117.488	3.282	7	146.8	2.86	10
				156.744	3.1738	7	130.544	5.2495	14	116.226	2.8158	7	147.3	3.4	10
		10		157.882	3.2462	7	129.689	5.2803	14	114.964	3.8051	7	147.2	3.08	10
				156.532	3.3083	7	129.511	5.4055	14	114.396	2.3302	7	145.6	3.22	10
				155.981	3.27	7	130.298	5.5115	14	115.011	3.1956	7	145.2	3.44	10
				157.504	3.3211	7	128.819	5.4399	14	113.245	3.1418	7	145.6	3.53	10
				156.651	3.2161	7	128.51	5.4838	14	113.769	3.5263	7	144.9	3.64	10
				155.898	2.9124	7	127.792	5.1904	14	112.521	3.3314	7	144.8	3.19	10
				158.048	3.1344	7	128.474	5.4067	14	112.844	3.3329	7	144.3	4.23	10
				156.15	2.7449	7	128.541	5.5348	14	112.402	3.6413	7	144	3.74	10
				155.598	2.5583	7	128.094	5.6541	14	110.317	3.5462	7	143.9	3.47	10
				157.364	2.7957	7	127.847	5.4737	14	111.213	2.6736	7	143.3	3.84	10
				154.899	2.9111	7	127.793	5.6778	14	113.614	3.3738	7	144.9	4.01	10
				156.873	2.9989	7	127.927	5.5461	14	111.424	4.3068	7	143.1	4.05	10
				155.661	3.3919	7	127.469	6.0489	14	110.496	3.5108	7	142.7	3.9	10
				155.775	2.8757	7	128.161	5.3776	14	108.828	3.4736	7	142.6	3.48	10
				157.639	3.076	7	127.188	5.7527	14	109.824	3.1103	7	142.7	2.93	10
				156.776	3.456	7	126.056	5.6934	14	109.758	3.1739	7	141.6	2.64	10
				155.973	3.2629	7	127.873	5.6729	14	110.299	3.0553	7	142.3	3.22	10
				155.387	3.5686	7	125.531	5.1686	14	108.197	2.9599	7	140.8	3.14	10
				156.679	3.747	7	125.737	5.6184	14	110.266	3.0862	7	141.1	3.87	10
				155.9	3.033	7	125.329	5.4912	14	109.711	3.232	7	139.9	3.51	10
				155.384	3.7986	7	126.188	5.6454	14	110.83	2.8899	7	141.6	3.42	10
				155.323	3.5038	7	125.029	5.5949	14	108.241	3.2896	7	140.2	4.19	10
				154.52	3.5705	7	125.541	5.2451	14	109.37	2.7816	7	139.9	3.85	10
				154.242	4.0321	7	125.309	5.4161	14	108.825	3.0169	7	140.9	3.41	10
				153.848	3.8246	7	124.734	5.0635	14	108.606	3.4265	7	140.8	3.43	10
				153.347	3.966	7	124.679	5.5373	14	108.933	3.2801	7	139.5	3.25	10
				153.52	3.7071	7	124.058	5.3714	14	108.8	2.5285	7	139.8	3.52	10
				152.912	3.3141	7	124.888	5.7281	14	109.014	2.8905	7	140.5	3.5	10
				153.598	3.814	7	123.528	5.8603	14	108.036	3.2473	7	140	3.64	10
				154.28	3.4981	7	124.552	6.1261	14	108.49	3.394	7	138.5	3.86	10
		20		153.701	4.5315	7	125.068	5.3905	14	108.308	3.2753	7	139.7	3.56	10
				153.393	3.6176	7	123.619	5.4427	14	108.63	2.7164	7	138.3	3.67	10
				152.519	3.248	7	122.697	6.0043	14	108.582	2.562	7	138.1	3.53	10
				153.187	3.8292	7	123.094	5.8627	14	109	2.9117	7	137.5	3.45	10
				153.031	3.352	7	122.813	5.5888	14	107.787	3.0509	7	137.7	4.02	10
				152.347	4.0222	7	123.776	5.7868	14	107.946	3.3623	7	137.7	3.51	10
				152.494	3.2705	7	123.825	5.7541	14	107.92	3.1482	7	138.3	3.41	10
				152.975	3.1205	7	124.537	5.2054	14	107.028	2.127	7	137.8	3.98	10
				152.444	3.7176	7	123.55	5.7427	14	107.013	2.7659	7	137.5	3.75	10
				154.052	4.3316	7	123.635	5.8252	14	107.267	2.9667	7	137.4	3.82	10
				155.479	4.0122	7	123.93	5.7757	14	107.621	2.8068	7	137.1	4.46	10
				153.615	4.6637	7	123.495	5.4492	14	106.207	3.373	7	136.9	3.88	10
				152.442	5.0684	7	124.696	5.644	14	106.101	2.8804	7	135.8	3.78	10
				152.873	3.7552	7	123.387	5.4962	14	104.905	2.6185	7	137.4	3.84	10
				151.193	4.1713	7	121.493	5.5224	14	106.48	2.5887	7	137.3	4.39	10
				153.322	3.9938	7	122.793	5.6393	14	107.771	2.5304	7	137.1	4.66	10
				151.846	4.0906	7	125.543	6.205	14	107.107	2.2204	7	137.5	4.51	10
				151.694	3.7508	7	123.331	5.7274	14	106.869	2.4151	7	135.8	3.92	10
				150.655	4.4331	7	122.579	5.5215	14	107.643	2.6701	7	136.6	3.82	10
				151.734	4.2627	7	124.292	5.7959	14	107.506	2.7414	7	136.7	3.9	10
				149.959	4.3346	7	123.495	5.4856	14	102.969	2.6776	7	135.7	4.28	10
				152.716	3.9208	7	122.523	5.8785	14	105.791	2.5345	7	136.2	4.49	10
				150.739	3.9022	7	121.989	5.8188	14	107.785	2.0259	7	135.5	3.89	10
				151.745	3.5405	7	122.166	5.8492	14	106.813	2.5922	7	135.6	4.67	10
				150.651	4.0421	7	122.437	5.5479	14	107.521	2.086	7	135.8	4.48	10
				150.878	3.0804	7	121.677	5.4774	14	104.647	3.2343	7	135.9	4.78	10
				150.636	3.6077	7	121.883	5.5028	14	107.19	2.4418	7	136.5	4.41	10
				150.5	3.3676	7	120.582	5.6817	14	105.046	2.9905	7	137.2	4.63	10
				150.732	4.0228	7	121.85	5.8084	14	106.426	2.9409	7	135.9	4.25	10
				151.005	3.9617	7	121.792	5.7888	14	106.668	2.4151	7	136.5	4.72	10
		30		150.095	3.8444	7	124.231	6.1293	14	104.503	2.6022	7	137.1	4.6	10
				149.002	3.8575	7	122.087	6.0229	14	105.319	3.0834	7	136.2	3.91	10
				151.333	3.6977	7	122.599	5.8578	14	104.138	2.8331	7	137.8	4.55	10
				151.142	4.0645	7	120.881	6.2697	14	102.867	2.2576	7	137.7	5.25	10
				151.147	4.0163	7	121.166	5.9919	14	105.093	2.8531	7	137.1	5.32	10
				151.758	4.0337	7	122.717	6.0368	14	105.656	2.8416	7	136.1	4.78	10
				151.957	3.3056	7	122.974	5.9984	14	103.713	3.0533	7	137.1	5.15	10
				150.976	4.2328	7	122.372	5.4961	14	103.906	2.6438	7	137	4.78	10
				150.654	3.4161	7	122.137	6.1283	14	103.457	2.0587	7	135.9	4.45	10
				151.367	3.4193	7	121.333	5.7117	14	104.284	2.2176	7	136.9	4.82	10
				151.081	4.1634	7	121.404	5.8408	14	103.653	1.8689	7	137.2	5.18	10
				151.59	2.9745	7	121.43	5.6458	14	106.724	2.436	7	137.2	4.49	10
				151.002	3.9026	7	121.664	6.0191	14	105.212	3.2629	7	136.6	4.83	10
				150.498	4.1171	7	121.053	5.9962	14	106.673	2.625	7	136.8	4.98	10
				150.944	4.2973	7	121.394	5.7027	14	105.275	2.9458	7	138.9	5.58	10
				150.591	3.5882	7	121.667	5.5359	14	105.728	3.1749	7	137	5.32	10
				150.931	3.4842	7	122.28	5.7916	14	105.348	2.8212	7	136.8	5.19	10
				150.326	3.3748	7	122.043	5.4227	14	103.662	2.6159	7	136.9	4.99	10
				151.886	4.394	7	121.794	5.7543	14	104.244	2.4839	7	137.1	4.91	10
				151.768	4.1092	7	123.591	5.8614	14	103.974	2.8205	7	137.2	5.09	10
				150.364	3.5446	7	123.073	5.6998	14	105.715	3.4055	7	137.1	4.48	10
				151.459	3.8562	7	122.586	6.0774	14	103.744	2.228	7	137.2	5.58	10
				151.743	4.4438	7	122.766	5.6707	14	104.254	2.6966	7	135.6	5.1	10
				150.931	3.686	7	122.506	6.0977	14	103.765	2.0415	7	137	5.43	10
				150.399	4.1857	7	121.578	5.7146	14	103.511	2.1604	7	137.9	5.43	10
				152.18	4.4184	7	123.206	5.9136	14	104.199	1.7775	7	138.5	5.06	10
				153.926	3.9551	7	124.55	6.1572	14	103.11	1.9776	7	137.6	5.39	10
				150.677	3.481	7	122.719	5.8544	14	104.682	1.895	7	137.9	5.75	10
				152.818	3.5764	7	122.427	6.0153	14	103.883	1.4655	7	137.1	5.6	10
				152.165	3.4882	7	123.884	5.9561	14	104.103	1.4749	7	136.8	5.67	10
		40		152.104	3.1986	7	123.873	5.7337	14	103.243	2.2708	7	137.4	5.85	10
		50
		60
		70

## Sheet: Figure 6E
			siScrambled									siP18
		WT	163.16	163.27	141.414	146.614	152.301	152.056	145.912			125.638	91.9517	94.2679	96.076	120.427	105.108	146.537	127.102	146.494	161.57	121.223	135.154	120.256	142.416
		AS	98.4023	97.682	102.374	100.924	99.8362	111.923	111.557			129.426	136.112	132.125	109.122	164.962	132.425	168.591	149.257	122.499	129.135
		ANOVA table	SS	DF	MS	F (DFn, DFd)	P value
		Interaction	8505	1	8505	F (1, 34) = 29.78	P < 0.0001
		Row Factor	2736	1	2736	F (1, 34) = 9.581	P = 0.0039
		Column Factor	75.93	1	75.93	F (1, 34) = 0.2659	P = 0.6094
		Residual	9711	34	285.6
		Tukey's multiple comparisons test	Mean Diff.	95% CI of diff.	Significant?	Summary	Adjusted P Value
		WT:siScrambled vs. WT:siP18	28.23	7.102 to 49.36	Yes	**	0.0052
		WT:siScrambled vs. AS:siScrambled	48.86	24.46 to 73.26	Yes	****	< 0.0001
		WT:siScrambled vs. AS:siP18	14.74	-7.755 to 37.23	No	ns	0.3051
		WT:siP18 vs. AS:siScrambled	20.63	-0.4984 to 41.76	No	ns	0.0577
		WT:siP18 vs. AS:siP18	-13.49	-32.39 to 5.406	No	ns	0.2355
		AS:siScrambled vs. AS:siP18	-34.12	-56.62 to -11.63	Yes	**	0.0013

## Sheet: figure supplement 1A
	p18 number
		WT	AS
		9.8	25.9
		7.1	11.7
		10.2	19.3
		8.6	17.4
		11.5	18.7
		7.7	15.3
		Unpaired t test
		P value	0.0014
		P value summary	**
		Significantly different? (P < 0.05)	Yes
		One- or two-tailed P value?	Two-tailed
		t, df	t=4.350 df=10
	PSD95 number
		WT	AS
		12.3	14.5
		10.6	10.7
		13.6	11.9
		14.2	12.9
		10.3	12.2
		11	10.3
		Unpaired t test
		P value	0.9291
		P value summary	ns
		Significantly different? (P < 0.05)	No
		One- or two-tailed P value?	Two-tailed
		t, df	t=0.09131 df=10
	percentage
		WT	AS
		16.2602	20.6897
		9.43396	18.6916
		14.7059	16.8067
		14.0845	23.2558
		9.70874	24.5902
		18.1818	19.4175
		Unpaired t test
		P value	0.0043
		P value summary	**
		Significantly different? (P < 0.05)	Yes
		One- or two-tailed P value?	Two-tailed
		t, df	t=3.671 df=10

## Sheet: figure supplement 1E
	p-mTOR		siScrambled						siP18
		WT	99.7342	98.1866	93.3597	108.719			80.1313	68.7822	84.3349	82.0978
		AS	128.279	111.255	132.649	133.28			85.4619	89.4169	94.3921
		ANOVA table	SS	DF	MS	F (DFn, DFd)	P value
		Interaction	220.2	1	220.2	F (1, 11) = 3.867	P = 0.0750
		Row Factor	1283	1	1283	F (1, 11) = 22.53	P = 0.0006
		Column Factor	3081	1	3081	F (1, 11) = 54.10	P < 0.0001
		Residual	626.4	11	56.95
		Tukey's multiple comparisons test	Mean Diff.	95% CI of diff.	Significant?	Summary	Adjusted P Value
		WT:siScrambled vs. WT:siP18	21.16	5.104 to 37.22	Yes	*	0.0101
		WT:siScrambled vs. AS:siScrambled	-26.37	-42.42 to -10.31	Yes	**	0.0021
		WT:siScrambled vs. AS:siP18	10.24	-7.103 to 27.59	No	ns	0.3335
		WT:siP18 vs. AS:siScrambled	-47.53	-63.59 to -31.47	Yes	****	< 0.0001
		WT:siP18 vs. AS:siP18	-10.92	-28.27 to 6.426	No	ns	0.2846
		AS:siScrambled vs. AS:siP18	36.61	19.26 to 53.95	Yes	***	0.0003
	p-S6
			siScrambled						siP18
		WT	97.5326	93.4777	105.354	103.636			63.9822	67.1281	62.2606	58.6761
		AS	127.755	118.883	137.101	147.175			72.6431	99.6162	82.9431
		ANOVA table	SS	DF	MS	F (DFn, DFd)	P value
		Interaction	105.1	1	105.1	F (1, 11) = 1.227	P = 0.2916
		Row Factor	2770	1	2770	F (1, 11) = 32.33	P = 0.0001
		Column Factor	6614	1	6614	F (1, 11) = 77.19	P < 0.0001
		Residual	942.5	11	85.69
		Tukey's multiple comparisons test	Mean Diff.	95% CI of diff.	Significant?	Summary	Adjusted P Value
		WT:siScrambled vs. WT:siP18	36.99	17.29 to 56.69	Yes	***	0.0007
		WT:siScrambled vs. AS:siScrambled	-32.73	-52.43 to -13.03	Yes	**	0.0019
		WT:siScrambled vs. AS:siP18	14.93	-6.345 to 36.21	No	ns	0.2086
		WT:siP18 vs. AS:siScrambled	-69.72	-89.42 to -50.02	Yes	****	< 0.0001
		WT:siP18 vs. AS:siP18	-22.06	-43.33 to -0.7785	Yes	*	0.0416
		AS:siScrambled vs. AS:siP18	47.66	26.38 to 68.94	Yes	***	0.0002
	PKCα
			siScrambled						siP18
		WT	97.6264	93.6895	98.1746	110.51			119.876	126.581	118.109	107.572
		AS	70.2671	73.7555	74.2539	84.9725			110.135	105.969	109.637
		ANOVA table	SS	DF	MS	F (DFn, DFd)	P value
		Interaction	200.4	1	200.4	F (1, 11) = 4.623	P = 0.0546
		Row Factor	1045	1	1045	F (1, 11) = 24.10	P = 0.0005
		Column Factor	2382	1	2382	F (1, 11) = 54.96	P < 0.0001
		Residual	476.8	11	43.35
		Tukey's multiple comparisons test	Mean Diff.	95% CI of diff.	Significant?	Summary	Adjusted P Value
		WT:siScrambled vs. WT:siP18	-18.03	-32.04 to -4.023	Yes	*	0.0118
		WT:siScrambled vs. AS:siScrambled	24.19	10.18 to 38.20	Yes	**	0.0014
		WT:siScrambled vs. AS:siP18	-8.58	-23.71 to 6.553	No	ns	0.3657
		WT:siP18 vs. AS:siScrambled	42.22	28.21 to 56.23	Yes	****	< 0.0001
		WT:siP18 vs. AS:siP18	9.454	-5.679 to 24.59	No	ns	0.2904
		AS:siScrambled vs. AS:siP18	-32.77	-47.90 to -17.63	Yes	***	0.0002
