# Supplementary material for: UBE3A-mediated p18/LAMTOR1 ubiquitination and degradation regulate mTORC1 activity and synaptic plasticity
Source: eLife. 2018 Jul 18;7:e37993. doi: 10.7554/eLife.37993 (PMC6063731; doi:10.7554/eLife.37993)
Supplement: Figure 7—source data 1. [file elife-37993-fig7-data1.xlsx]

## Sheet: Figure 7A
				WT-siP18			WT-siP18+MHY1485			WT-siScrambled
		-10		100.299	1.4405	14	96.61	2.73	3	101.025	0.9594	7
				100.877	0.9051	14	98.71	2.15	3	100.866	0.842	7
				101.031	0.9258	14	96.03	6.03	3	100.929	0.808	7
				101.14	1.0779	14	95.78	6.33	3	100.234	0.5614	7
				101.122	0.6702	14	99.43	2.27	3	100.163	0.8435	7
				101.569	1.0517	14	98.91	3.13	3	99.178	0.4215	7
				100.178	0.7327	14	96.73	3.89	3	99.7957	0.7266	7
				101.816	1.2174	14	102	0.73	3	100.262	0.73	7
				102.377	0.9475	14	102.1	2.3	3	100.366	0.8143	7
				100.059	0.8894	14	100.3	4.58	3	100.232	0.7284	7
				99.9766	0.9179	14	99.05	2.71	3	100.299	0.8209	7
				100.165	1.0445	14	98.01	1.73	3	100.593	0.6739	7
				100.464	0.9347	14	99.95	0.54	3	100.048	0.5723	7
				99.1983	0.9167	14	98.79	1.82	3	99.2834	0.399	7
				99.3988	0.8709	14	97.9	1.85	3	99.3023	0.4362	7
				99.9583	0.9262	14	100.8	1.02	3	99.0818	0.613	7
				100.258	0.9635	14	101.5	3.69	3	98.986	0.6417	7
				99.773	0.748	14	101.9	2.91	3	100.426	1.1418	7
				99.7627	0.9183	14	100.1	1.19	3	99.4187	0.6504	7
				99.0618	1.0983	14	101.3	0.27	3	100.211	0.3036	7
				99.9591	0.6172	14	99.31	1.61	3	99.6736	0.77	7
				97.7793	0.8203	14	99.91	1.57	3	100.162	0.3996	7
				97.2261	1.0556	14	105.8	4.96	3	100.304	0.5028	7
				97.8033	0.7193	14	103	5.36	3	99.6834	0.6959	7
				98.629	0.9118	14	100.8	3.57	3	99.8411	1.0536	7
				97.0567	0.9495	14	106	6.25	3	99.8249	0.9908	7
				99.2152	0.7749	14	102.2	2.42	3	99.8406	1.1432	7
				100.296	1.2247	14	99.73	1.43	3	100.313	1.0639	7
				99.0643	1.1958	14	99.17	1.42	3	99.2662	1.2658	7
				104.485	5.9702	14	97.92	4.81	3	100.393	0.9533	7
		0		165.066	5.7831	14	199.8	4.21	3	177.925	5.4971	7
				159.052	6.8253	14	189.7	7.9	3	178.171	5.3352	7
				160.88	6.6745	14	179.3	1.24	3	181.322	4.4826	7
				154.133	6.5121	14	180.2	5.1	3	178.916	4.795	7
				153.258	5.9474	14	176.5	6.67	3	175.986	4.4833	7
				150.942	6.3706	14	175	5.93	3	173.97	5.0352	7
				147.031	5.7612	14	176.6	8.93	3	169.556	4.8162	7
				148.489	5.8055	14	174.8	5.96	3	168.082	5.495	7
				145.583	5.5747	14	171.6	10.8	3	165.465	5.4863	7
				143.108	5.6638	14	173	8.93	3	163.264	4.4059	7
				142.727	5.3837	14	174.1	6.03	3	161.47	4.9475	7
				141.262	5.384	14	171.9	5.53	3	162.365	4.6711	7
				141.228	5.3758	14	172	4.65	3	160.729	4.5769	7
				141.582	5.6026	14	173	4.89	3	160.144	4.2568	7
				139.596	5.0869	14	167.9	5.98	3	160.363	4.6153	7
				136.286	5.4595	14	163.8	7.68	3	159.45	4.2443	7
				138.811	5.2394	14	164.6	6.39	3	159.286	4.5671	7
				137.671	5.5109	14	164.2	5.69	3	159.053	4.6356	7
				136.119	5.2691	14	170.8	3.33	3	158.59	4.5337	7
				137.219	5.2466	14	169.4	2.62	3	158.117	3.7441	7
				134.273	5.2978	14	167.7	1.61	3	158.155	4.0539	7
				136.208	5.1871	14	165.1	3.17	3	158.794	3.8707	7
				135.388	4.8622	14	160.4	5.62	3	158.012	4.1076	7
				133.102	4.9443	14	160.1	5.91	3	159.075	3.2256	7
				133.641	5.0491	14	164.1	2.94	3	157.533	3.8976	7
				131.55	5.4181	14	162.6	2.68	3	157.019	3.7586	7
				131.424	5.4266	14	165.6	1.67	3	157.287	3.8712	7
				130.553	5.3217	14	161.4	2.07	3	157.707	3.5946	7
				129.753	5.5617	14	165.5	0.48	3	158.451	3.5889	7
				130.544	5.2495	14	161.9	1.51	3	156.744	3.1738	7
		10		129.689	5.2803	14	159.3	2.99	3	157.882	3.2462	7
				129.511	5.4055	14	161.9	0.97	3	156.532	3.3083	7
				130.298	5.5115	14	163.8	2.56	3	155.981	3.27	7
				128.819	5.4399	14	159.2	1.39	3	157.504	3.3211	7
				128.51	5.4838	14	159	1.12	3	156.651	3.2161	7
				127.792	5.1904	14	162.1	3.69	3	155.898	2.9124	7
				128.474	5.4067	14	157.8	4.54	3	158.048	3.1344	7
				128.541	5.5348	14	151.8	8.22	3	156.15	2.7449	7
				128.094	5.6541	14	158.5	5.18	3	155.598	2.5583	7
				127.847	5.4737	14	157.4	1.81	3	157.364	2.7957	7
				127.793	5.6778	14	155.1	3.18	3	154.899	2.9111	7
				127.927	5.5461	14	156.4	6.95	3	156.873	2.9989	7
				127.469	6.0489	14	159	2.4	3	155.661	3.3919	7
				128.161	5.3776	14	153.4	8.1	3	155.775	2.8757	7
				127.188	5.7527	14	161.5	5.09	3	157.639	3.076	7
				126.056	5.6934	14	156	6.28	3	156.776	3.456	7
				127.873	5.6729	14	157.8	3.62	3	155.973	3.2629	7
				125.531	5.1686	14	157	6.85	3	155.387	3.5686	7
				125.737	5.6184	14	159.8	3.44	3	156.679	3.747	7
				125.329	5.4912	14	155	5.46	3	155.9	3.033	7
				126.188	5.6454	14	157.6	5.45	3	155.384	3.7986	7
				125.029	5.5949	14	158.3	5.16	3	155.323	3.5038	7
				125.541	5.2451	14	158.1	4.44	3	154.52	3.5705	7
				125.309	5.4161	14	159.4	4.89	3	154.242	4.0321	7
				124.734	5.0635	14	155.9	8.64	3	153.848	3.8246	7
				124.679	5.5373	14	160.1	4.2	3	153.347	3.966	7
				124.058	5.3714	14	157	8.56	3	153.52	3.7071	7
				124.888	5.7281	14	160.9	4.65	3	152.912	3.3141	7
				123.528	5.8603	14	157	5.23	3	153.598	3.814	7
				124.552	6.1261	14	159.6	6.87	3	154.28	3.4981	7
		20		125.068	5.3905	14	161.3	4.88	3	153.701	4.5315	7
				123.619	5.4427	14	156.7	7.83	3	153.393	3.6176	7
				122.697	6.0043	14	157.4	9.4	3	152.519	3.248	7
				123.094	5.8627	14	157.1	5.95	3	153.187	3.8292	7
				122.813	5.5888	14	159.4	5.15	3	153.031	3.352	7
				123.776	5.7868	14	157.6	5.84	3	152.347	4.0222	7
				123.825	5.7541	14	154.6	6.74	3	152.494	3.2705	7
				124.537	5.2054	14	162.1	5.41	3	152.975	3.1205	7
				123.55	5.7427	14	156.7	7.66	3	152.444	3.7176	7
				123.635	5.8252	14	162.4	6.82	3	154.052	4.3316	7
				123.93	5.7757	14	157	6.24	3	155.479	4.0122	7
				123.495	5.4492	14	161.1	7.37	3	153.615	4.6637	7
				124.696	5.644	14	162.3	6.29	3	152.442	5.0684	7
				123.387	5.4962	14	161.4	6.89	3	152.873	3.7552	7
				121.493	5.5224	14	160.8	7.3	3	151.193	4.1713	7
				122.793	5.6393	14	163.6	7.34	3	153.322	3.9938	7
				125.543	6.205	14	163.6	6	3	151.846	4.0906	7
				123.331	5.7274	14	160.1	7.54	3	151.694	3.7508	7
				122.579	5.5215	14	163.6	5.01	3	150.655	4.4331	7
				124.292	5.7959	14	162	8	3	151.734	4.2627	7
				123.495	5.4856	14	162.7	8.19	3	149.959	4.3346	7
				122.523	5.8785	14	162.8	6.46	3	152.716	3.9208	7
				121.989	5.8188	14	162.8	8.57	3	150.739	3.9022	7
				122.166	5.8492	14	160	8.2	3	151.745	3.5405	7
				122.437	5.5479	14	163.9	9.1	3	150.651	4.0421	7
				121.677	5.4774	14	159.9	6.52	3	150.878	3.0804	7
				121.883	5.5028	14	163.7	7.71	3	150.636	3.6077	7
				120.582	5.6817	14	160.9	7.88	3	150.5	3.3676	7
				121.85	5.8084	14	163.1	8.02	3	150.732	4.0228	7
				121.792	5.7888	14	161.7	7.94	3	151.005	3.9617	7
		30		124.231	6.1293	14	165.4	9.26	3	150.095	3.8444	7
				122.087	6.0229	14	165.2	6.55	3	149.002	3.8575	7
				122.599	5.8578	14	164.2	8.63	3	151.333	3.6977	7
				120.881	6.2697	14	165.4	6.59	3	151.142	4.0645	7
				121.166	5.9919	14	162.2	4.85	3	151.147	4.0163	7
				122.717	6.0368	14	156.1	1.22	3	151.758	4.0337	7
				122.974	5.9984	14	162.4	2.57	3	151.957	3.3056	7
				122.372	5.4961	14	163.1	4.62	3	150.976	4.2328	7
				122.137	6.1283	14	162.6	4.3	3	150.654	3.4161	7
				121.333	5.7117	14	159.9	4.36	3	151.367	3.4193	7
				121.404	5.8408	14	161	4.68	3	151.081	4.1634	7
				121.43	5.6458	14	162	5.63	3	151.59	2.9745	7
				121.664	6.0191	14	164.4	4.59	3	151.002	3.9026	7
				121.053	5.9962	14	164	6.05	3	150.498	4.1171	7
				121.394	5.7027	14	170.6	6.32	3	150.944	4.2973	7
				121.667	5.5359	14	163.4	6.57	3	150.591	3.5882	7
				122.28	5.7916	14	165.9	6.61	3	150.931	3.4842	7
				122.043	5.4227	14	166.4	5.84	3	150.326	3.3748	7
				121.794	5.7543	14	161.9	6.11	3	151.886	4.394	7
				123.591	5.8614	14	170.1	6.01	3	151.768	4.1092	7
				123.073	5.6998	14	161	4.78	3	150.364	3.5446	7
				122.586	6.0774	14	166.3	5.26	3	151.459	3.8562	7
				122.766	5.6707	14	167.5	5.66	3	151.743	4.4438	7
				122.506	6.0977	14	160.2	4.84	3	150.931	3.686	7
				121.578	5.7146	14	166.4	4.06	3	150.399	4.1857	7
				123.206	5.9136	14	161	4.5	3	152.18	4.4184	7
				124.55	6.1572	14	162.4	4.96	3	153.926	3.9551	7
				122.719	5.8544	14	164.7	4.24	3	150.677	3.481	7
				122.427	6.0153	14	166.3	4.76	3	152.818	3.5764	7
				123.884	5.9561	14	163.7	5.92	3	152.165	3.4882	7
		40		123.873	5.7337	14	164	6.24	3	152.104	3.1986	7
		50
		60
		70

## Sheet: Figure 7B
		WT-siP18	WT-siP18+MHY1485
		135.154	159.471
		120.256	176.383
		142.416	156.285
		125.638
		91.9517
		94.2679
		96.076
		120.427
		105.108
		146.537
		127.102
		146.494
		161.57
		121.223
		Unpaired t test
		P value	0.0073
		P value summary	**
		Significantly different? (P < 0.05)	Yes
		One- or two-tailed P value?	Two-tailed
		t, df	t=3.102 df=15

## Sheet: Figure 7E
			siScrambled			siP18
		WT	97.8374	95.9214	106.241	34.1395	26.8063	41.4975
		AS	135.734	125.524	128.813	68.851	47.5817	76.8565
		ANOVA table	SS	DF	MS	F (DFn, DFd)	P value
		Interaction	0.04992	1	0.04992	F (1, 8) = 0.0005870	P = 0.9813
		Row Factor	2728	1	2728	F (1, 8) = 32.07	P = 0.0005
		Column Factor	12959	1	12959	F (1, 8) = 152.4	P < 0.0001
		Residual	680.3	8	85.04
		Tukey's multiple comparisons test	Mean Diff.	95% CI of diff.	Significant?	Summary	Adjusted P Value
		WT:siScrambled vs. WT:siP18	65.85	41.74 to 89.96	Yes	***	0.0001
		WT:siScrambled vs. AS:siScrambled	-30.02	-54.14 to -5.912	Yes	*	0.0169
		WT:siScrambled vs. AS:siP18	35.57	11.46 to 59.68	Yes	**	0.0065
		WT:siP18 vs. AS:siScrambled	-95.88	-120.0 to -71.76	Yes	****	< 0.0001
		WT:siP18 vs. AS:siP18	-30.28	-54.39 to -6.170	Yes	*	0.0162
		AS:siScrambled vs. AS:siP18	65.59	41.48 to 89.71	Yes	***	0.0001
