# Supplementary material for: UBE3A-mediated p18/LAMTOR1 ubiquitination and degradation regulate mTORC1 activity and synaptic plasticity
Source: eLife. 2018 Jul 18;7:e37993. doi: 10.7554/eLife.37993 (PMC6063731; doi:10.7554/eLife.37993)
Supplement: Figure 8—source data 1. [file elife-37993-fig8-data1.xlsx]

## Sheet: Figure 8B
			siScrambled										siP18
		WT	0.9	1.1	1.6	0.9	1.3	1.1	1.2	0.9	0.9	1.1	0.5	0.4	0.8	0.9	1	1	0.9	1	0.8	0.9
		AS	0.4	0.1	0.2	0.6	0.5	0.4	0.8	0.3	0.6	0.3	0.8	0.8	1	0.7	1	0.9	1.2	0.9	0.8	0.8
		ANOVA table	SS	DF	MS	F (DFn, DFd)	P value
		Interaction	1.406	1	1.406	F (1, 36) = 35.13	P < 0.0001
		Row Factor	0.9302	1	0.9302	F (1, 36) = 23.24	P < 0.0001
		Column Factor	0.09025	1	0.09025	F (1, 36) = 2.255	P = 0.1419
		Residual	1.441	36	0.04003
		Tukey's multiple comparisons test	Mean Diff.	95% CI of diff.	Significant?	Summary	Adjusted P Value
		WT:siScrambled vs. WT:siP18	0.28	0.03903 to 0.5210	Yes	*	0.0174
		WT:siScrambled vs. AS:siScrambled	0.68	0.4390 to 0.9210	Yes	****	< 0.0001
		WT:siScrambled vs. AS:siP18	0.21	-0.03097 to 0.4510	No	ns	0.1063
		WT:siP18 vs. AS:siScrambled	0.4	0.1590 to 0.6410	Yes	***	0.0004
		WT:siP18 vs. AS:siP18	-0.07	-0.3110 to 0.1710	No	ns	0.8619
		AS:siScrambled vs. AS:siP18	-0.47	-0.7110 to -0.2290	Yes	****	< 0.0001

## Sheet: Figure 8D
	frequency
		WT	AS
		1.38	0.89
		1.09	0.92
		0.89	1.39
		0.9	0.3
		1.7	0.56
		1.5	0.51
		0.99	0.27
		0.65
		1.3
		0.7
		1.2
		1.04
		Unpaired t test
		P value	0.0215
		P value summary	*
		Significantly different? (P < 0.05)	Yes
		One- or two-tailed P value?	Two-tailed
		t, df	t=2.532 df=17
	amplitude
		WT	AS
		16	21
		15	14
		21	13
		16	12
		18	16
		21	12
		11	14
		12
		15
		14
		14
		20
		Unpaired t test
		P value	0.3431
		P value summary	ns
		Significantly different? (P < 0.05)	No
		One- or two-tailed P value?	Two-tailed
		t, df	t=0.9752 df=17

## Sheet: figure supplement 1A
			siScramble										siP18
		WT	1.76667	1.63333	1.5	1.56667	1.9	1.63333	1.33333	1.7	1.53333	1.63333	2.36667	1.96667	2.4	2.26667	2.33333	2.56667	2.43333	2.03333	2.46667	2.13333
		AS	0.866667	0.766667	1.23333	1.1	1	1.3	0.966667	1.03333	0.8	1.3	1.43333	1.73333	1.63333	1.46667	1.23333	1.8	1.66667	1.4	1.53333	1.83333
		ANOVA table	SS	DF	MS	F (DFn, DFd)	P value
		Interaction	0.049	1	0.049	F (1, 36) = 1.425	P = 0.2403
		Row Factor	4.268	1	4.268	F (1, 36) = 124.2	P < 0.0001
		Column Factor	3.68	1	3.68	F (1, 36) = 107.1	P < 0.0001
		Residual	1.238	36	0.03438
		Tukey's multiple comparisons test	Mean Diff.	95% CI of diff.	Significant?	Summary	Adjusted P Value
		WT:siScramble vs. WT:siP18	-0.6767	-0.9000 to -0.4534	Yes	****	< 0.0001
		WT:siScramble vs. AS:siScramble	0.5833	0.3600 to 0.8066	Yes	****	< 0.0001
		WT:siScramble vs. AS:siP18	0.04667	-0.1766 to 0.2700	No	ns	0.9424
		WT:siP18 vs. AS:siScramble	1.26	1.037 to 1.483	Yes	****	< 0.0001
		WT:siP18 vs. AS:siP18	0.7233	0.5000 to 0.9466	Yes	****	< 0.0001
		AS:siScramble vs. AS:siP18	-0.5367	-0.7600 to -0.3134	Yes	****	< 0.0001

## Sheet: figure supplement 1B
			Filopodia										Thin										Stubby										Mushroom										Mutiple Heads
		WT-siScramble	17.6471	6.25	0	6.25	0	5.88235	5.26316	6.66667	5.55556	5.26316	29.4118	25	20	37.5	43.4783	29.4118	31.5789	33.3333	44.4444	36.8421	23.5294	31.25	40	18.75	17.3913	29.4118	10.5263	26.6667	16.6667	15.7895	29.4118	31.25	40	31.25	30.4348	35.2941	42.1053	33.3333	33.3333	42.1053	0	6.25	0	6.25	8.69565	0	10.5263
		WT-siP18	20	19.0476	33.3333	25	23.3333	19.2308	21.7391	26.6667	22.2222	26.9231	46.6667	61.9048	37.037	37.5	43.3333	42.3077	39.1304	40	33.3333	38.4615	20	9.52381	14.8148	20.8333	13.3333	15.3846	13.0435	13.3333	11.1111	15.3846	13.3333	9.52381	11.1111	12.5	16.6667	23.0769	21.7391	20	22.2222	19.2308	0	0	3.7037	4.16667	3.33333	0	4.34783
		AS-siScramble	30	0	0	9.09091	0	8.33333	5.88235	0	7.14286	30	30	75	60	36.3636	50	58.3333	47.0588	66.6667	50	40	20	25	20	27.2727	20	16.6667	17.6471	11.1111	21.4286	10	20	0	20	27.2727	30	16.6667	17.6471	22.2222	21.4286	20	0	0	0	0	0	0	11.7647
		AS-siP18	19.0476	11.7647	16.6667	8.33333	5.26316	11.7647	5	5.88235	15.7895	11.7647	42.8571	41.1765	41.6667	33.3333	42.1053	35.2941	35	41.1765	42.1053	41.1765	14.2857	23.5294	12.5	16.6667	21.0526	23.5294	25	17.6471	15.7895	17.6471	23.8095	23.5294	25	33.3333	26.3158	29.4118	30	35.2941	26.3158	23.5294	0	0	4.16667	8.33333	5.26316	0	5
[truncated: 3 more columns]
